# Supplementary material for: Discrimination of serum samples of prostate cancer and benign prostatic hyperplasia with 1H-NMR metabolomics
Source: Royal Society of Chemistry journal article supplement (doi:10.1039/d4ay01109k), 2024-01-01
Supplement: d4ay01109k1.pdf [file d4ay01109k1.pdf]

Supplementary information file

**Discrimination of serum samples of prostate cancer and benign prostatic hyperplasia with  $^1\text{H-NMR}$  metabolomics**

Mohammed Zniber<sup>1</sup>, Parastoo Vahdatiyekta<sup>1</sup>, Tan-Phat Huynh<sup>1,\*</sup>

<sup>1</sup> *Laboratory of Molecular Sciences and Engineering, Åbo Akademi University 20500 Turku, Finland*

*E-mail address: [tan.huynh@abo.fi](mailto:tan.huynh@abo.fi)*

Supplementary figures S1, S2 and S3

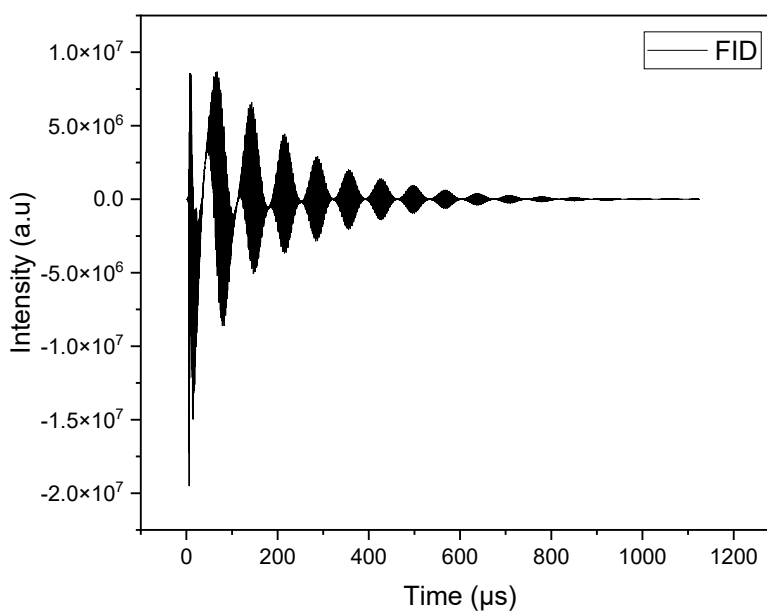

**Figure S1.** Real part of the FID signal.

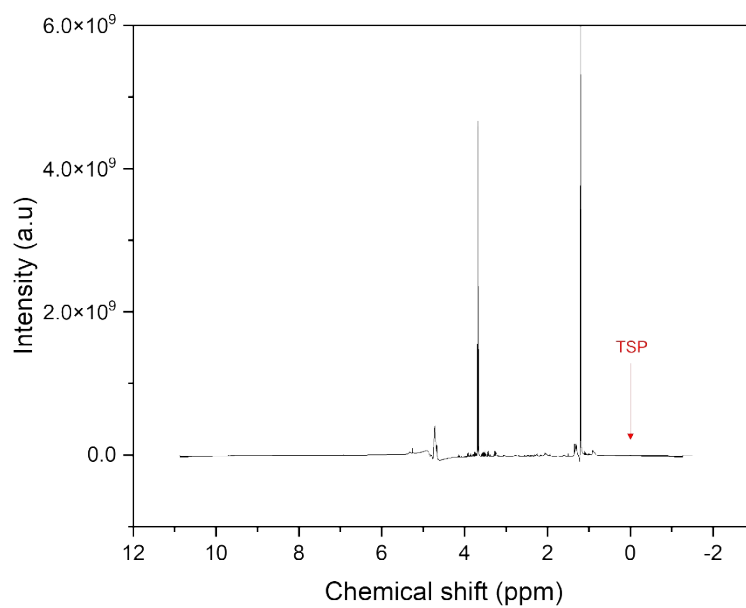

**Figure S2.** NMR spectrum with TSP as reference.

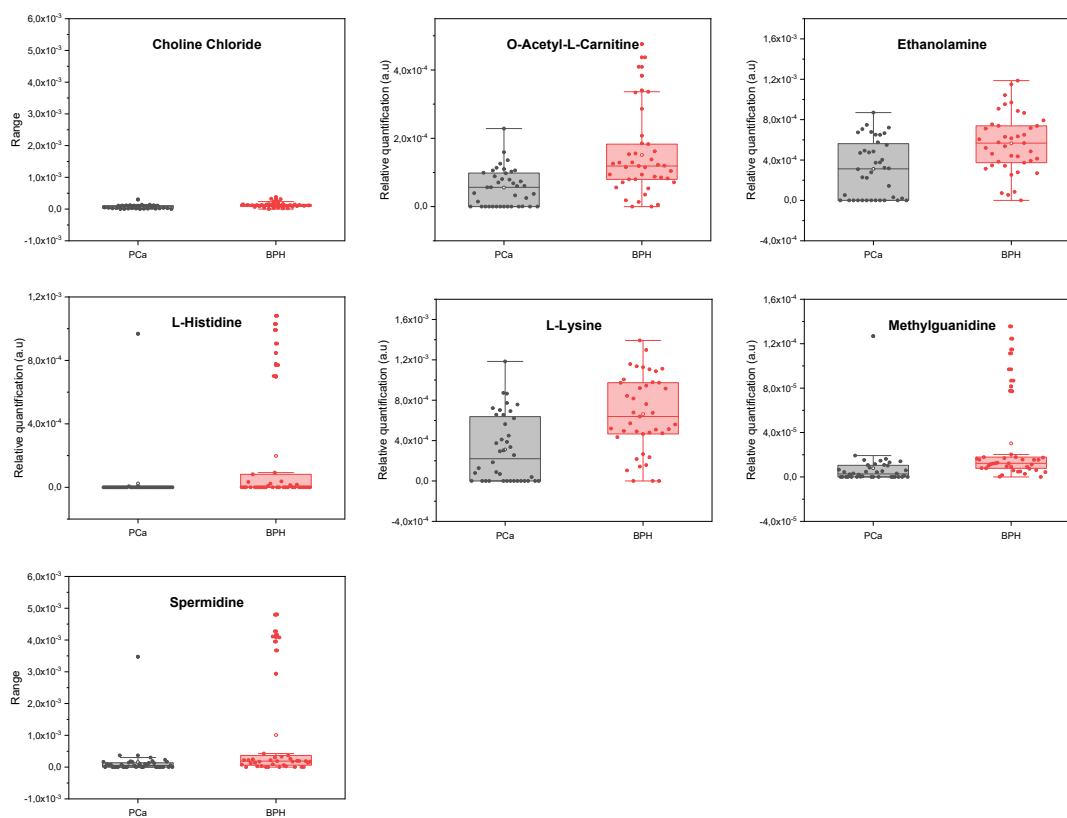

**Figure S3.** Box plots for the other highly significantly different metabolites in PCa and BPH.
